# Supplementary material for: SARS-CoV-2 Papain-Like Protease Potential Inhibitors—In Silico Quantitative Assessment
Source: PubMed Central journal article supplement (PMC8069282; doi:10.3390/ijms22083957), 2021-04-12
Supplement: ijms-22-03957-s001.pdf [file ijms-22-03957-s001.pdf]

## Supplementary Materials: SARS-CoV-2 Papain-Like Protease Potential Inhibitors—In Silico Quantitative Assessment

Adam Stasiulewicz <sup>1,2</sup> , Alicja W. Maksymiuk <sup>1,3</sup> , Mai Lan Nguyen <sup>1,4</sup> , Barbara Belza <sup>1,5</sup>  and Joanna I. Sulkowska <sup>1,6,\*</sup> 

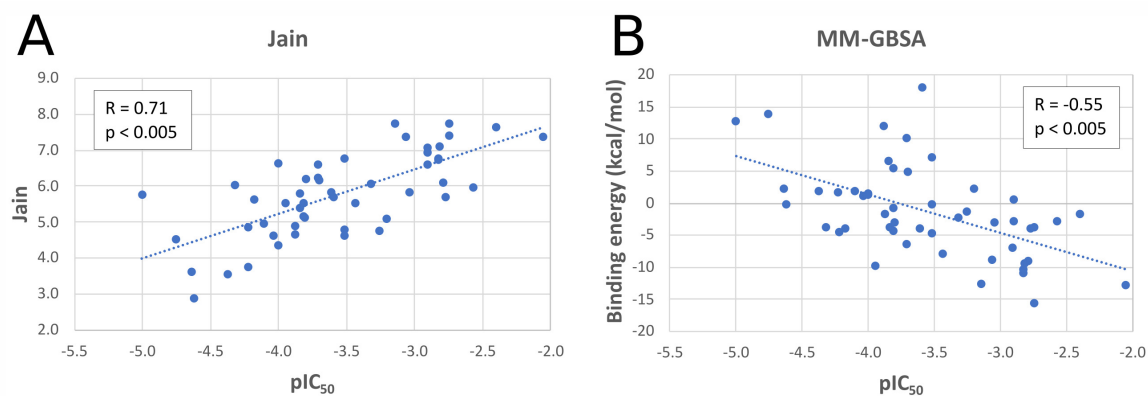

**Figure S1.** Correlation between values of scoring functions and binding energies, and pIC<sub>50</sub> values of the extended set of inhibitors docked to PLpro (PDB ID: 7jn2). (A) Jain scoring function. (B) MM-GBSA.



**Table 1.** Summary of SARS-CoV-2 PLpro crystal structures available in the PDB database.

| PDB ID | Ligand name   | Ligand type  | Resolution [Å] | Mutations | IC <sub>50</sub> [μM] | References |
|--------|---------------|--------------|----------------|-----------|-----------------------|------------|
| 6wrh   | -             | -            | 1.60           | C111S     | -                     | [1]        |
| 6wzu   | -             | -            | 1.79           | -         | -                     | [1]        |
| 6xg3   | -             | -            | 2.48           | C111S     | -                     | [1]        |
| 7cjd   | -             | -            | 2.50           | C111S     | -                     | [2]        |
| 6w9c   | -             | -            | 2.70           | -         | -                     | -          |
| 7d47   | -             | -            | 1.97           | C111S     | -                     | -          |
| 7d6h   | -             | -            | 1.60           | C111S     | -                     | -          |
| 7nfv   | -             | -            | 1.42           | -         | -                     | -          |
| 6xaa   | ubiquitin     | -            | 2.70           | C111S     | -                     | [3]        |
| 6yva   | ISG15         | -            | 3.18           | C111S     | -                     | [4]        |
| 6xa9   | ISG15         | -            | 2.90           | -         | -                     | [3]        |
| 6wuu   | VIR250        | covalent     | 2.79           | -         | -                     | [5]        |
| 6wx4   | VIR251        | covalent     | 1.66           | -         | -                     | [5]        |
| 7jir   | GRL0617       | non-covalent | 2.09           | C111S     | 2.30                  | [1]        |
| 7jit   | PLP_Snyder495 | non-covalent | 1.95           | C111S     | 5.10                  | [1]        |
| 7jiv   | PLP_Snyder530 | non-covalent | 2.05           | C111S     | 6.40                  | [1]        |
| 7jiw   | PLP_Snyder530 | non-covalent | 2.30           | -         | 6.40                  | [1]        |
| 7cmd   | GRL0617       | non-covalent | 2.59           | -         | 2.20                  | [2]        |
| 7cjm   | GRL0617       | non-covalent | 3.20           | C111S     | 2.20                  | -          |
| 7jrn   | GRL0617       | non-covalent | 2.48           | -         | 2.20                  | -          |
| 7jn2   | PLP_Snyder441 | non-covalent | 1.93           | -         | -                     | -          |
| 7koj   | PLP_Snyder494 | non-covalent | 2.02           | C111S     | -                     | -          |
| 7kok   | PLP_Snyder496 | non-covalent | 2.00           | C111S     | -                     | -          |
| 7kol   | PLP_Snyder496 | non-covalent | 2.58           | -         | -                     | -          |
| 7krx   | PLP_Snyder441 | non-covalent | 2.72           | C111S     | -                     | -          |
| 7lbr   | XR8-89        | non-covalent | 2.20           | -         | 0.11                  | [6]        |
| 7lbs   | XR8-24        | non-covalent | 2.80           | -         | 0.56                  | [6]        |
| 7llf   | XR8-83        | non-covalent | 2.30           | -         | 0.21                  | [6]        |
| 7llz   | XR8-69        | non-covalent | 2.90           | -         | 0.37                  | [6]        |
| 7los   | XR8-65        | non-covalent | 2.90           | -         | 0.33                  | [6]        |
| 7e35   | S43           | non-covalent | 2.40           | C111S     | -                     | -          |
| 7m1y   | ebselen       | -            | 2.02           | C111S     | -                     | -          |

**Table 2.** Cross-docking ligand heavy-atom RMSD [Å] after superposition of proteins by C $\alpha$  atoms. Redocking results are presented in green. If the PDB structure had more than one protein chain, the chain chosen in this table has its name added after underscore. 7jir, 7jrn, 7cjm, and 7cmd have the same inhibitor so only the results of 7jir ligand docking are presented. The same applies to 7jiw and 7jiv. Two endmost ligands come from SARS-CoV PLpro.

| Ligand from | Protein structure |        |      |        |      |      |      |        |      |      |        |  |
|-------------|-------------------|--------|------|--------|------|------|------|--------|------|------|--------|--|
|             | 7jir              | 7jrn_A | 7cjm | 7cmd_D | 7jit | 7jiv | 7jiw | 6wuu_A | 6wx4 | 7jn2 | 6w9c_A |  |
| 7jir        | 0.4               | 2.7    | 0.8  | 0.6    | 0.4  | 0.6  | 0.3  | 6.7    | 7.5  | 0.5  | 1.3    |  |
| 7jit        | 1.8               | 1.7    | 1.0  | 1.1    | 1.2  | 1.0  | 1.0  | 6.2    | 6.5  | 2.8  | 4.5    |  |
| 7jiv        | 0.5               | 0.8    | 1.2  | 0.6    | 0.5  | 0.3  | 0.3  | 4.7    | 4.9  | 4.2  | 8.1    |  |
| 6wuu        | 8.0               | 8.3    | 9.3  | 8.7    | 8.7  | 8.0  | 8.6  | 1.1    | 2.5  | 6.0  | 9.7    |  |
| 6wx4        | 9.9               | 9.8    | 7.8  | 9.9    | 8.4  | 8.3  | 8.0  | 2.6    | 2.0  | 6.0  | 9.7    |  |
| 7jn2        | 1.6               | 1.8    | 1.7  | 1.7    | 0.5  | 2.9  | 2.8  | 4.0    | 6.8  | 1.6  | 1.8    |  |
| 4ovz        | 2.9               | 3.4    | 3.5  | 3.5    | 2.8  | 3.0  | 2.8  | 8.0    | 8.8  | 3.1  | 2.8    |  |
| 4ow0        | 3.0               | 3.6    | 9.2  | 3.7    | 2.9  | 2.9  | 2.9  | 7.9    | 8.3  | 3.3  | 6.6    |  |

**Table 3.** Pearson correlation coefficients between pIC<sub>50</sub> values of inhibitors and values of scoring functions and MM–GBSA listed in the first column. Abbreviations: E.—Energy, I.E.—Interaction Energy. Top nine functions are expected to have positive correlations, whereas MM–GBSA is expected to be negatively correlated. Values above 0.5 or below −0.5 are shown in green. If the PDB structure has more than one chain, the chain chosen in this table has its name added after underscore. 7jit and 7jiv have a C111S mutation, and 7jit\_Cys and 7jiv\_Cys have the serine residue mutated back into cysteine.

|               | 7jiw  | 6w9c_A | 7jn2  | 7jit  | 7jit_Cys | 7jiv  | 7jiv_Cys | 7cmd_D | 7jrn_A |
|---------------|-------|--------|-------|-------|----------|-------|----------|--------|--------|
| −CDOCKER E.   | 0.13  | 0.17   | 0.16  | 0.08  | 0.17     | 0.17  | 0.12     | 0.11   | 0.18   |
| −CDOCKER I.E. | 0.46  | 0.60   | 0.56  | 0.38  | 0.45     | 0.45  | 0.46     | 0.55   | 0.62   |
| LigScore1     | 0.19  | 0.38   | 0.22  | 0.10  | 0.18     | 0.18  | 0.16     | 0.17   | 0.24   |
| LigScore2     | 0.19  | 0.31   | 0.22  | 0.10  | 0.17     | 0.17  | 0.11     | 0.10   | 0.26   |
| −PLP1         | 0.06  | 0.26   | 0.25  | 0.02  | 0.16     | 0.16  | 0.06     | 0.21   | 0.39   |
| −PLP2         | 0.14  | 0.32   | 0.31  | 0.00  | 0.25     | 0.25  | 0.16     | 0.27   | 0.41   |
| Jain          | 0.53  | 0.53   | 0.73  | 0.39  | 0.43     | 0.43  | 0.44     | 0.65   | 0.23   |
| −PMF          | 0.39  | 0.12   | 0.37  | 0.49  | 0.45     | 0.45  | 0.46     | 0.21   | 0.36   |
| −PMF04        | 0.39  | 0.21   | 0.44  | 0.51  | 0.47     | 0.47  | 0.42     | 0.14   | 0.29   |
| MM–GBSA       | −0.66 | −0.54  | −0.64 | −0.50 | −0.56    | −0.64 | −0.64    | −0.53  | −0.66  |

**Table 4.** Cross-docking results for 7jn2. Ligands from the PDB entries in the first column were docked to the 7jn2 PLpro structure. Proteins were superimposed by C $\alpha$  atoms and ligand heavy-atom RMSD [Å] was calculated. Redocking results are presented in green. 6wuu and 6wx4 have covalent inhibitors. Two endmost ligands come from SARS-CoV PLpro.

| Ligand from | RMSD [Å] |
|-------------|----------|
| 7jn2        | 1.6      |
| 7jir        | 0.5      |
| 7jit        | 2.8      |
| 7jiv        | 4.2      |
| 7koj        | 1.5      |
| 7kok        | 1.2      |
| 7lbr        | 1.1      |
| 7lbs        | 1.3      |
| 7llf        | 4.5      |
| 7llz        | 4.3      |
| 7los        | 1.7      |
| 7e35        | 3.6      |
| 6wuu        | 6.0      |
| 6wx4        | 6.0      |
| 4ovz        | 3.1      |
| 4ow0        | 3.3      |

**Table 5.** Performance of the selected pharmacophore for different numbers of omitted features. The value of 14 was selected for the drug screening.

| Max. Number of Omitted Features | Hits | True positives | EF <sub>1%</sub> |
|---------------------------------|------|----------------|------------------|
| 17                              | 574  | 6              | 67.0             |
| 16                              | 569  | 6              | 67.0             |
| 15                              | 288  | 5              | 67.0             |
| 14                              | 110  | 5              | 67.0             |
| 13                              | 24   | 5              | 67.0             |
| 12                              | 6    | 4              | 111.7            |

**Table 6.** SARS-CoV-2 PLpro inhibitors used for the confirmatory validation of the best pharmacophore. Names in the first column reflect the names used in the cited sources.

| Compound  | IC <sub>50</sub> [nM] | References |
|-----------|-----------------------|------------|
| Jun9-72-2 | 670                   |            |
| Jun9-75-4 | 620                   | [7]        |
| Jun9-75-5 | 560                   |            |
| Jun9-84-3 | 670                   |            |
| DY-3-15   | 800                   |            |
| XR8-23    | 390                   |            |
| XR8-24    | 560                   |            |
| XR8-30    | 750                   |            |
| XR8-32-2  | 810                   |            |
| XR8-57    | 700                   | [6]        |
| XR8-65    | 330                   |            |
| XR8-67    | 170                   |            |
| XR8-79    | 410                   |            |
| XR8-83    | 210                   |            |
| XR8-89    | 113                   |            |
| XR8-98    | 810                   |            |
| ZN-2-185  | 600                   |            |
| ZN-2-187  | 800                   |            |
| ZN-3-80   | 590                   |            |
| rac5c_R   | 810                   | [3]        |

**Table 7.** PLpro inhibitors used for validation of binding affinity prediction. Names in the first column reflect the names used in the cited sources.

| Compound   | IC <sub>50</sub> [nM] | Description                              | References |
|------------|-----------------------|------------------------------------------|------------|
| 2          | 5100                  | GRL0617 derivatives                      | [1]        |
| 3          | 6400                  |                                          |            |
| 4          | 43200                 |                                          |            |
| 5          | 16800                 |                                          |            |
| 6          | 7000                  |                                          |            |
| 7          | 12700                 |                                          |            |
| 2a         | 6900                  |                                          |            |
| 2i         | 15000                 |                                          |            |
| 2n         | 42000                 |                                          |            |
| 2p         | 7500                  |                                          |            |
| 2r         | 10000                 |                                          |            |
| 2s         | 10000                 |                                          |            |
| 14h        | 7600                  |                                          |            |
| 14k        | 57000                 | similar to the ligand from 4ovz          | [9]        |
| 6577871    | 100700                |                                          |            |
| 7724772_R  | 23500                 |                                          |            |
| 7724772_S  |                       | S enantiomer                             |            |
| Compound 6 | 5000                  | GRL0617 amide, R enantiomer              | [10]       |
| GRL0617    | 2100                  | ligand from 7jir                         |            |
| rac3j_R    | 1400                  | ligand from 4ovz                         | [3]        |
| rac3j_S    |                       | S enantiomer                             |            |
| rac3k_R    | 1150                  | ligand from 4ow0                         | [3]        |
| rac3k_S    |                       | S enantiomer                             |            |
| rac5c_R    | 810                   | similar to the ligand from 4ow0 and 4ovz | [3]        |
| rac5c_S    |                       | S enantiomer                             |            |

**Table 8.** PLpro inhibitors used for additional validation of binding affinity prediction. Names in the first column reflect the names used in the cited sources.

| Compound   | IC <sub>50</sub> [nM] | References |
|------------|-----------------------|------------|
| Jun9-67-1  | 2720                  |            |
| Jun9-68-3  | 5130                  |            |
| Jun9-72-2  | 670                   |            |
| Jun9-75-3  | 8890                  | [7]        |
| Jun9-75-4  | 620                   |            |
| Jun9-75-5  | 560                   |            |
| Jun9-84-3  | 670                   |            |
| Jun9-85-1  | 660                   |            |
| Jun9-85-5  | 16590                 |            |
| Jun9-86-2  | 6490                  |            |
| DY-3-15    | 800                   |            |
| DY-3-65    | 6300                  |            |
| DY-3-66    | 3300                  |            |
| DY2-109    | 21000                 |            |
| DY2-137    | 3300                  |            |
| XDY2-62    | 3300                  |            |
| XR8-24     | 560                   | [6]        |
| XR8-61     | 6500                  |            |
| XR8-69     | 370                   |            |
| XR8-89     | 113                   |            |
| XR8-9      | 1800                  |            |
| XR8-96     | 250                   |            |
| ZN-2-181   | 1100                  |            |
| ZN-2-187   | 800                   |            |
| ZN-2-188-1 | 1600                  |            |
| ZN-3-56    | 3900                  |            |
| ZN-3-66    | 4100                  |            |
| ZN-3-71    | 10900                 |            |
| ZN-3-80    | 590                   |            |

**Table 9.** Summary of compounds with known in vitro activity against UCH-L1 used for molecular docking validation conducted in Maestro 2017-1.  $\Delta G_{\text{bind}}$  values show MM-GBSA binding free energies calculated for ligands docked to the UCH-L1 structure (PDB ID: 4jkj, chain B) using Glide SP.

| Compound   | IC <sub>50</sub> [nM] | $\Delta G_{\text{bind}}$ [kcal/mol] | References |
|------------|-----------------------|-------------------------------------|------------|
| 1          | 6000                  | −42.78                              |            |
| 3          | 12000                 | −39.12                              |            |
| 5          | 17000                 | −48.80                              |            |
| 8          | 51000                 | −44.01                              |            |
| 9          | 290000                | −19.22                              |            |
| 10         | 126000                | −26.29                              |            |
| 11         | 75000                 | −20.77                              |            |
| 13         | 3400                  | −40.99                              |            |
| 14         | 3400                  | −43.96                              |            |
| 20         | 36000                 | −43.39                              | [11]       |
| 30         | 880                   | −43.07                              |            |
| 31         | 1200                  | −41.71                              |            |
| 33         | 1300                  | −43.93                              |            |
| 34         | 1800                  | −46.37                              |            |
| 38         | 9500                  | −28.85                              |            |
| 41         | 16000                 | −35.46                              |            |
| 42         | 19000                 | −40.20                              |            |
| 43         | 19000                 | −35.70                              |            |
| 45         | 52000                 | −38.15                              |            |
| 46         | 95000                 | −36.92                              |            |
| 50         | 810                   | −46.00                              |            |
| 51         | 940                   | −46.45                              |            |
| 53         | 2900                  | −45.52                              |            |
| 57         | 12000                 | −35.96                              |            |
| 59         | 12000                 | −45.55                              |            |
| 60         | 15000                 | −41.12                              |            |
| 61         | 16000                 | −48.76                              |            |
| 63         | 50000                 | −40.56                              |            |
| B2         | 15000                 | −28.13                              | [12]       |
| Vialinin A | 22300                 | −30.07                              | [13]       |



## Abbreviations

The following abbreviations are used in this manuscript:

|                  |                                                                 |
|------------------|-----------------------------------------------------------------|
| EF               | enrichment factor                                               |
| IC <sub>50</sub> | half maximal inhibitory concentration                           |
| ISG15            | interferon-stimulated gene 15                                   |
| MLR              | multiple linear regression                                      |
| MM-GBSA          | molecular mechanics-generalized Born and surface area solvation |
| PDB              | Protein Data Bank                                               |
| PLpro            | papain-like protease                                            |
| RMSD             | root-mean-square deviation                                      |
| SARS-CoV         | severe acute respiratory syndrome coronavirus                   |
| SP               | standard precision                                              |
| UCH-L1           | ubiquitin carboxy-terminal hydrolase L1                         |

## References

1. Osipiuk, J.; Azizi, S.A.; Dvorkin, S.; Endres, M.; Jedrzejczak, R.; Jones, K.A.; Kang, S.; Kathayat, R.S.; Kim, Y.; Lisnyak, V.G.; et al. Structure of papain-like protease from SARS-CoV-2 and its complexes with non-covalent inhibitors. *Nat. Commun.* **2021**, *12*, 1–9.
2. Gao, X.; Qin, B.; Chen, P.; Zhu, K.; Hou, P.; Wojdyla, J.A.; Wang, M.; Cui, S. Crystal structure of SARS-CoV-2 papain-like protease. *Acta Pharm. Sin. B* **2021**, *11*, 237–245.
3. Klemm, T.; Ebert, G.; Calleja, D.J.; Allison, C.C.; Richardson, L.W.; Bernardini, J.P.; Lu, B.G.; Kuchel, N.W.; Grohmann, C.; Shibata, Y.; et al. Mechanism and inhibition of the papain-like protease, PLpro, of SARS-CoV-2. *EMBO J.* **2020**, *39*, e106275.
4. Shin, D.; Mukherjee, R.; Grewe, D.; Bojkova, D.; Baek, K.; Bhattacharya, A.; Schulz, L.; Widera, M.; Mehdipour, A.R.; Tascher, G.; et al. Papain-like protease regulates SARS-CoV-2 viral spread and innate immunity. *Nature* **2020**, *587*, 657–662.
5. Rut, W.; Lv, Z.; Zmudzinski, M.; Patchett, S.; Nayak, D.; Snipas, S.J.; El Oualid, F.; Huang, T.T.; Bekes, M.; Drag, M.; et al. Activity profiling and crystal structures of inhibitor-bound SARS-CoV-2 papain-like protease: A framework for anti-COVID-19 drug design. *Sci. Adv.* **2020**, *6*, eabd4596.
6. Shen, Z.; Ratia, K.; Cooper, L.; Kong, D.; Lee, H.; Kwon, Y.; Li, Y.; Alqarni, S.; Huang, F.; Dubrovskiy, O.; et al. Potent, Novel SARS-CoV-2 PLpro Inhibitors Block Viral Replication in Monkey and Human Cell Cultures. *bioRxiv* **2021**.
7. Xia, Z.; Sacco, M.; Ma, C.; Townsend, J.; Kitamura, N.; Hu, Y.; Ba, M.; Szeto, T.; Zhang, X.; Meng, X.; et al. Discovery of SARS-CoV-2 papain-like protease inhibitors through a combination of high-throughput screening and FlipGFP-based reporter assay. *bioRxiv* **2021**.
8. Welker, A.; Kersten, C.; Müller, C.; Madhugiri, R.; Zimmer, C.; Müller, P.; Zimmermann, R.; Hammerschmidt, S.; Maus, H.; Ziebuhr, J.; et al. Structure-Activity Relationships of Benzamides and Isoindolines Designed as SARS-CoV Protease Inhibitors Effective against SARS-CoV-2. *ChemMedChem* **2020**, *15*, 1–16.
9. Freitas, B.T.; Durie, I.A.; Murray, J.; Longo, J.E.; Miller, H.C.; Crich, D.; Hogan, R.J.; Tripp, R.A.; Pegan, S.D. Characterization and Noncovalent Inhibition of the Deubiquitinase and deISGylase Activity of SARS-CoV-2 Papain-Like Protease. *ACS Infect. Dis.* **2020**, *6*, 2099–2109.
10. Fu, Z.; Huang, B.; Tang, J.; Liu, S.; Liu, M.; Ye, Y.; Liu, Z.; Xiong, Y.; Cao, D.; Li, J.; et al. Structural basis for the inhibition of the papain-like protease of SARS-CoV-2 by small molecules. *bioRxiv* **2020**.
11. Liu, Y.; Lashuel, H.A.; Choi, S.; Xing, X.; Case, A.; Ni, J.; Yeh, L.A.; Cuny, G.D.; Stein, R.L.; Lansbury Jr, P.T. Discovery of inhibitors that elucidate the role of UCH-L1 activity in the H1299 lung cancer cell line. *Chem. Biol.* **2003**, *10*, 837–846.
12. Mitsui, T.; Hirayama, K.; Aoki, S.; Nishikawa, K.; Uchida, K.; Matsumoto, T.; Kabuta, T.; Wada, K. Identification of a novel chemical potentiator and inhibitors of UCH-L1 by in silico drug screening. *Neurochem. Int.* **2010**, *56*, 679–686.
13. Okada, K.; Ye, Y.Q.; Taniguchi, K.; Yoshida, A.; Akiyama, T.; Yoshioka, Y.; Onose, J.I.; Koshino, H.; Takahashi, S.; Yajima, A.; et al. Vialinin A is a ubiquitin-specific peptidase inhibitor. *Bioorg. Med. Chem. Lett.* **2013**, *23*, 4328–4331.
